# Supplementary material for: Treatment Outcomes with Standard of Care in Relapsed/Refractory Diffuse Large B-Cell Lymphoma: Real-World Data Analysis
Source: PubMed Central journal article supplement — Adv Ther. 2024 Feb 2;41(3):1226–44. doi: 10.1007/s12325-023-02775-9 (PMC10879405; doi:10.1007/s12325-023-02775-9), 2024-02-02
Supplement: 12325_2023_2775_MOESM1_ESM.pdf [file 12325_2023_2775_MOESM1_ESM.pdf]

**Treatment Outcomes With Standard of Care in Relapsed/Refractory Diffuse Large  
B-cell Lymphoma: Real-world Data Analysis**

Andrew Ip<sup>1</sup>, Alex Mutebi<sup>2</sup>, Tongsheng Wang<sup>2</sup>, Monika Jun<sup>2</sup>, Anupama Kalsekar<sup>2</sup>,  
Fernando Rivas Navarro<sup>2</sup>, Anthony Wang<sup>3</sup>, Rajesh Kamalakar<sup>3</sup>, Mariana Sacchi<sup>2</sup>, Brian  
Elliott<sup>2</sup>

<sup>1</sup>Hackensack Meridian Health, Hackensack University Medical Center, Hackensack, NJ,  
USA <sup>2</sup>Genmab US, Inc., Plainsboro, NJ, USA

<sup>3</sup>AbbVie, Inc., North Chicago, IL, USA

**Correspondence:**

Alex Mutebi

Genmab US, Inc.

777 Scudders Mill Road

Plainsboro, NJ, 08536

Phone: (609) 366-0237

almu@genmab.com

## Supplementary Data

### Regimens of Interest

Regimens of interest included (but were not limited to) the following:

- Gemcitabine, oxaliplatin ± rituximab (R-GemOx)
- Cyclophosphamide, etoposide, prednisone, procarbazine ± rituximab (R-CEPP)
- Cyclophosphamide, etoposide, vincristine, prednisone ± rituximab (R-CEOP)
- Dose-adjusted etoposide, doxorubicin, cyclophosphamide, vincristine, prednisone ± rituximab (DA-EPOCH-R)
- Gemcitabine, dexamethasone, cisplatin ± rituximab (R-GDP)
- Gemcitabine, carboplatin, dexamethasone ± rituximab (R-GCD)
- Gemcitabine, vinorelbine ± rituximab (R-GN)
- Rituximab, ifosfamide, carboplatin and etoposide (RICE)
- Rituximab, dexamethasone, cytarabine, cisplatin (R-DHAP)
- Brentuximab vedotin [for CD30+ disease]
- Bendamustine ± rituximab (BR)
- Lenalidomide ± rituximab
- Lenalidomide (other than maintenance)
- Rituximab (other than maintenance)
- Obinutuzumab (other than maintenance)

**Supplementary Figure 1.** Kaplan-Meier plot for OS by primary refractory status. CI, confidence interval; LOTs, lines of therapy; OS, overall survival.

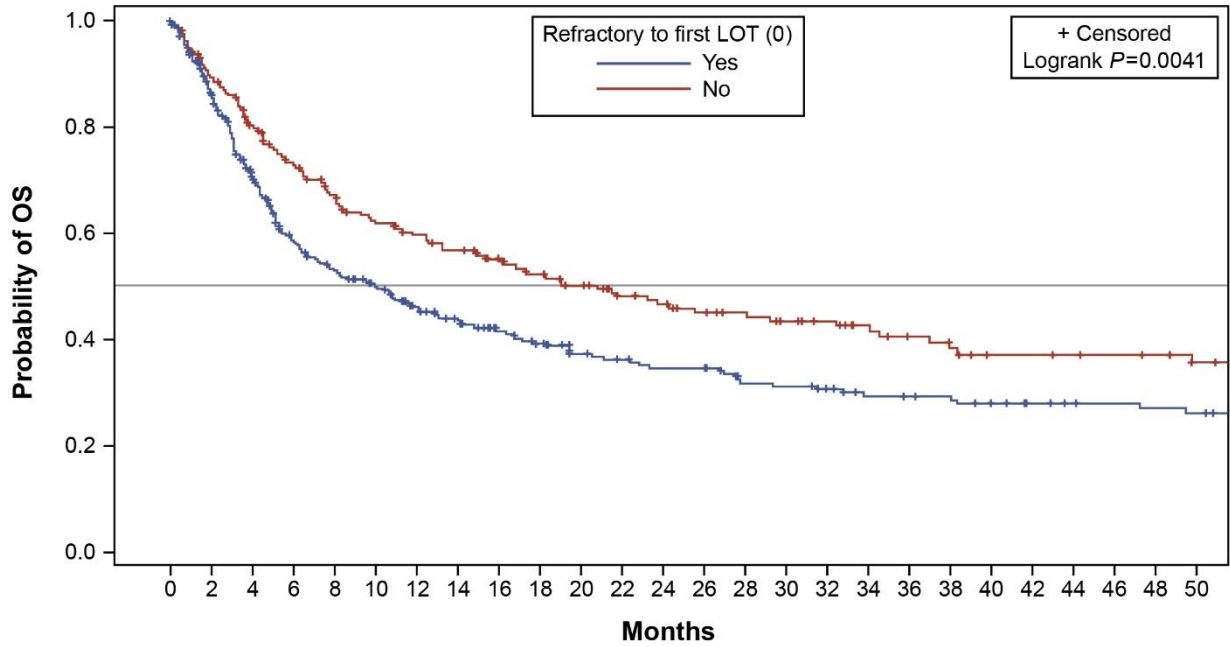

| Primary refractory | Total at risk | # of events | Median       | Lower 95% CI limit | Upper 95% CI limit |
|--------------------|---------------|-------------|--------------|--------------------|--------------------|
| Yes                | 355           | 213         | <b>9.98</b>  | 6.74               | 13.02              |
| No                 | 218           | 120         | <b>20.86</b> | 13.32              | 32.46              |

**Supplementary Figure 2.** Kaplan-Meier plot for OS by refractoriness to last LOT. CI, confidence interval; LOTs, lines of therapy; OS, overall survival.

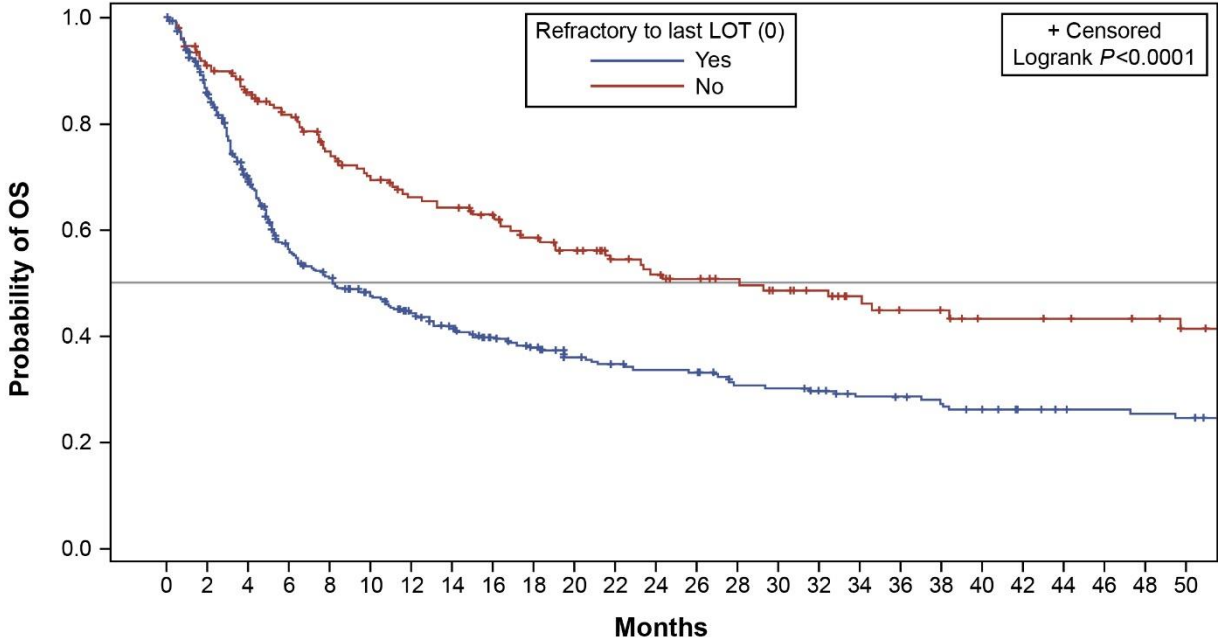

| Refractory to last LOT | Total at risk | # of events | Median | Lower 95% CI limit | Upper 95% CI limit |
|------------------------|---------------|-------------|--------|--------------------|--------------------|
| Yes                    | 393           | 244         | 8.17   | 6.21               | 11.6               |
| No                     | 180           | 89          | 28.1   | 18.28              | 52                 |

**Supplementary Figure 3.** Kaplan-Meier plot for OS by refractoriness to last anti-CD20–containing regimen. CI, confidence interval; LOTs, lines of therapy; OS, overall survival.

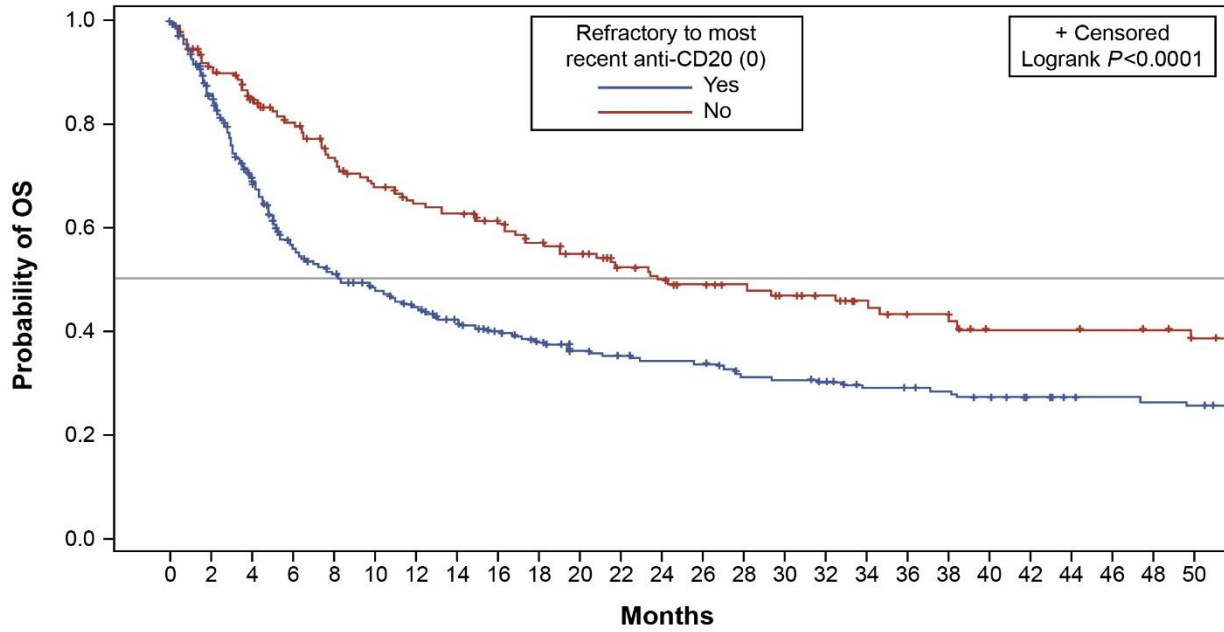

| Refractory to most recent anti-CD20 | Total at risk | # of events | Median | Lower 95% CI limit | Upper 95% CI limit |
|-------------------------------------|---------------|-------------|--------|--------------------|--------------------|
| Yes                                 | 388           | 238         | 8.23   | 6.28               | 11.93              |
| No                                  | 185           | 95          | 23.77  | 17.36              | 38.38              |

**Supplementary Figure 4.** Kaplan-Meier plot for OS by prior CAR T exposure. CAR T, chimeric antigen receptor T cell; CI, confidence interval; LOTs, lines of therapy; OS, overall survival.

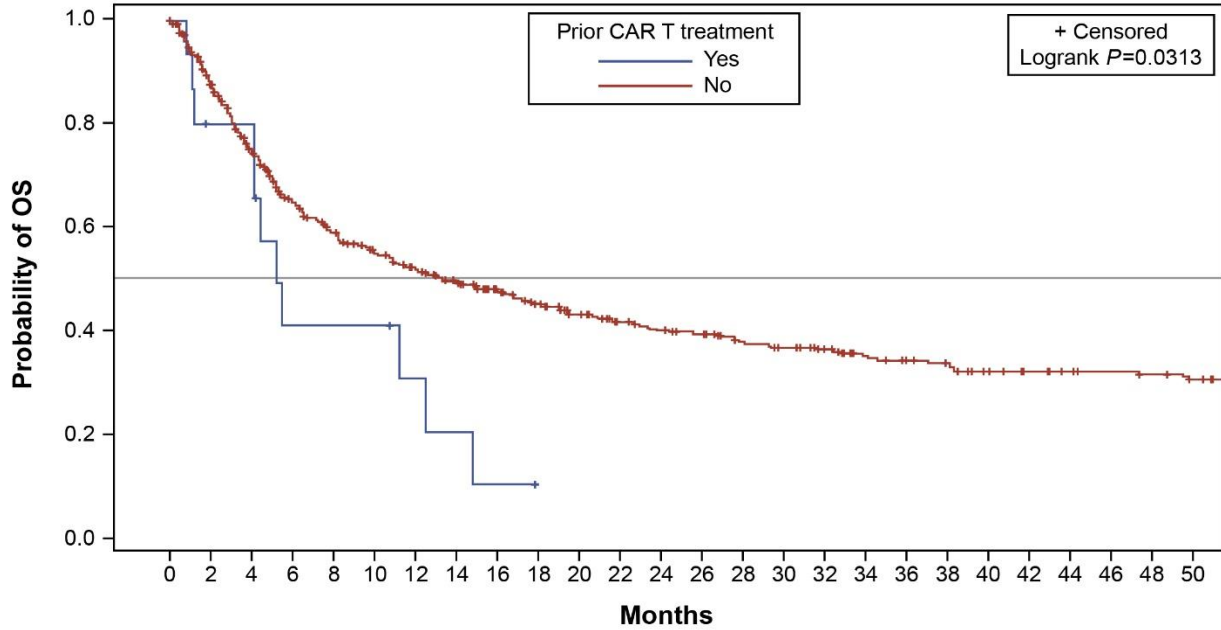

| Prior CAR T treatment | Total at risk | # of events | Median | Lower 95% CI limit | Upper 95% CI limit |
|-----------------------|---------------|-------------|--------|--------------------|--------------------|
| No                    | 557           | 322         | 13.29  | 10.45              | 17.42              |
| Yes                   | 16            | 11          | 5.22   | 1.16               | 12.5               |
